# Supplementary material for: Targeting Mycobacterial F-ATP Synthase C-Terminal α Subunit Interaction Motif on Rotary Subunit γ
Source: MDPI journal article supplement (doi:10.3390/antibiotics10121456), 2021-11-26
Supplement: s1 [file s1]

## Supplementary Materials

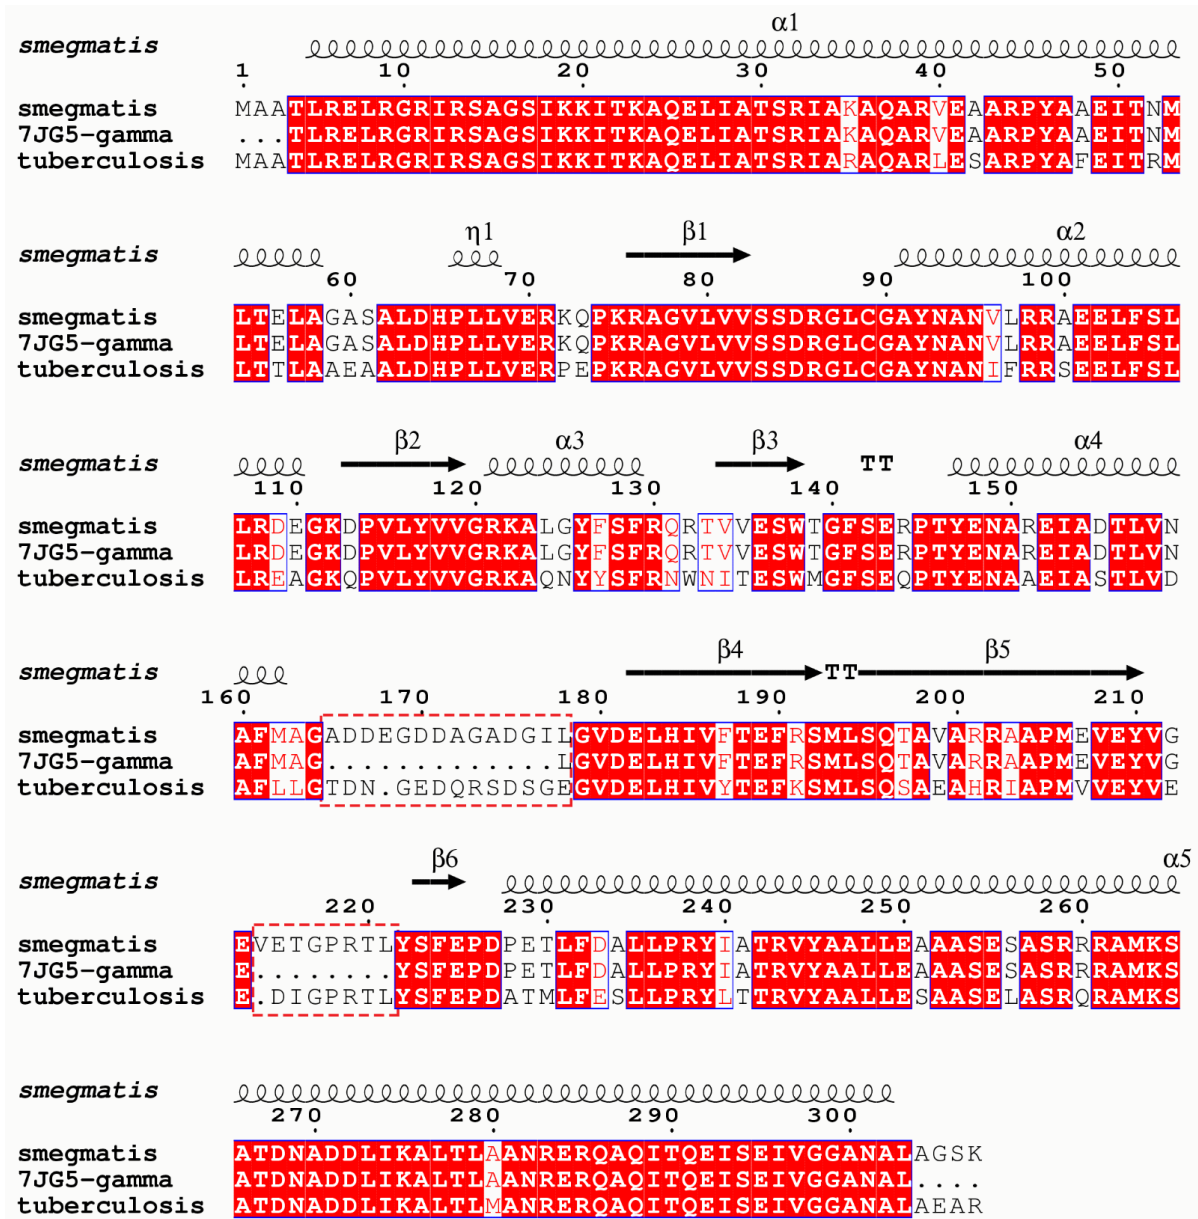

**Figure S1.** Sequence alignment of Mtb  $\gamma$  subunit with the *M. smegmatis*  $\gamma$  subunit sequence and structure sequence (7JG5:G chain). Loop elements A165-L163 (13 aa), V214-L221 (8 aa), which lacked template coordinates with the 7JG5:G chain, are shown with red colored hashed rectangle boxes.

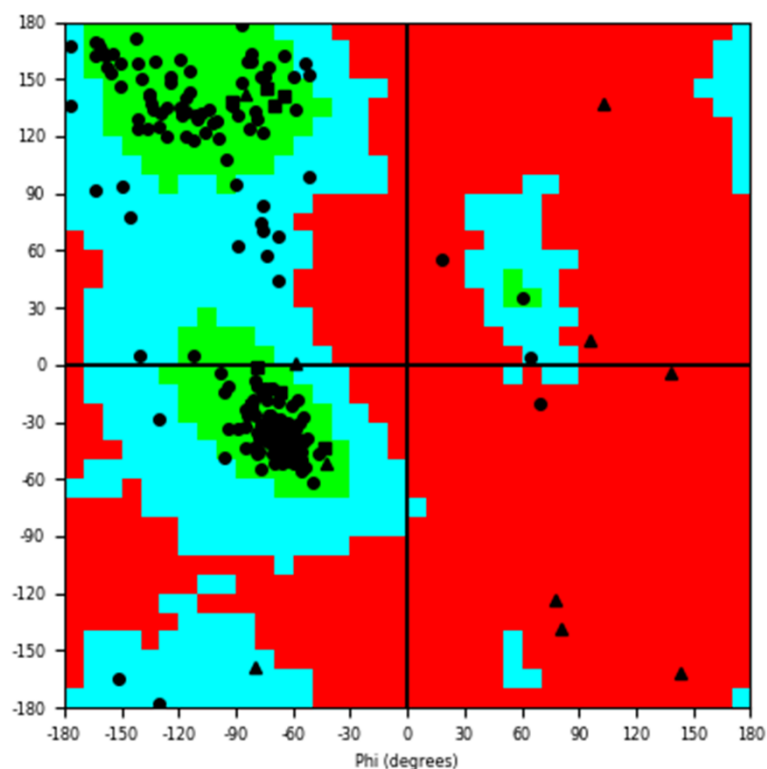

**Figure S2.** Ramachandran plot showing the stereochemical quality of the Mtb  $\gamma$  model. Most of the residues are in most favored regions (green zone), allowed (cyan) and very few residues such as G168, D170, G176, I215 from loop regions are in disallowed regions. While the other five residues appear to be also present with template structure. The data confirm that the structure, which was built from Prime homology model building tools, is reliable. (Residue markers: Triangle Glycine, Squares: Proline, Circles: All other residues).

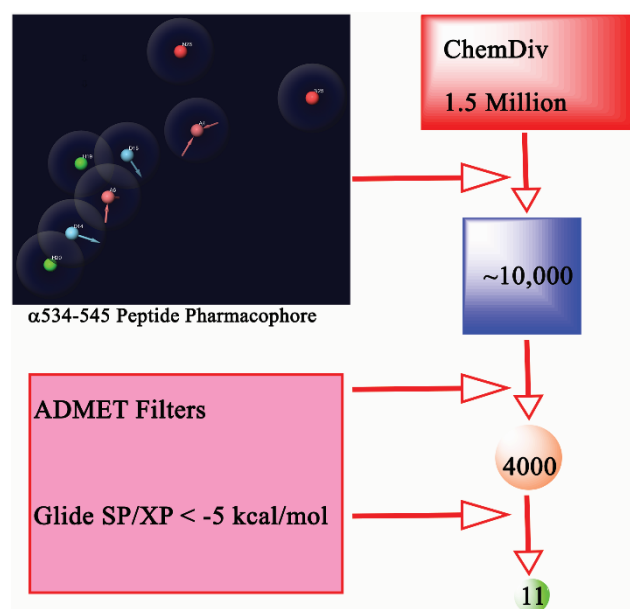

**Figure S3.** Flow chart showing the virtual screening steps.  $\alpha$ 533-545 peptide-based pharmacophore search on the Chemdiv database yielded about 10,000 ligands. This focused library was further enumerated with property filters, glide docking / scoring of poses with SP/ XP scoring functions. Pose selection of ligands, which match the interaction pattern of the  $\alpha$ 533-545 peptide, led to a selection of eleven molecules for experimental characterization.

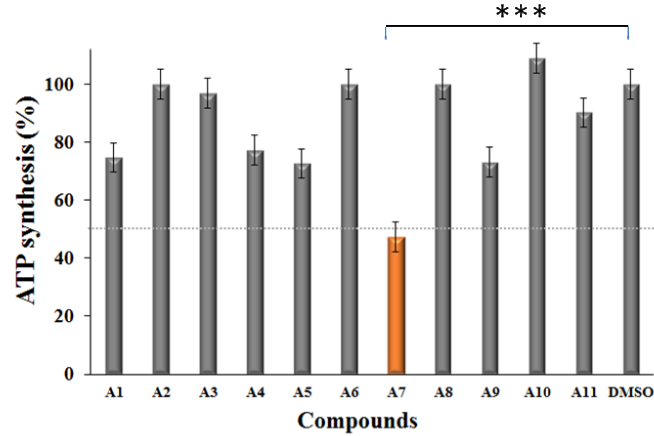

**Figure S4.** Testing the potency of eleven selected compounds (100  $\mu$ M each) in inhibiting mycobacterial ATP synthesis of *M. smegmatis* IMV's. The dotted line represents the threshold of below 50% inhibition. ATP synthesis (%) in the presence of the compound is expressed as a percent of control to untreated (DMSO)  $[(I_0 - I)/I_0 \times 100]$ , where  $I_0$  is untreated and  $I$  is treated with compound. \*\*\*:  $P < 0.0001$ , statistical analysis was carried out using one way ANOVA (analysis of variance).

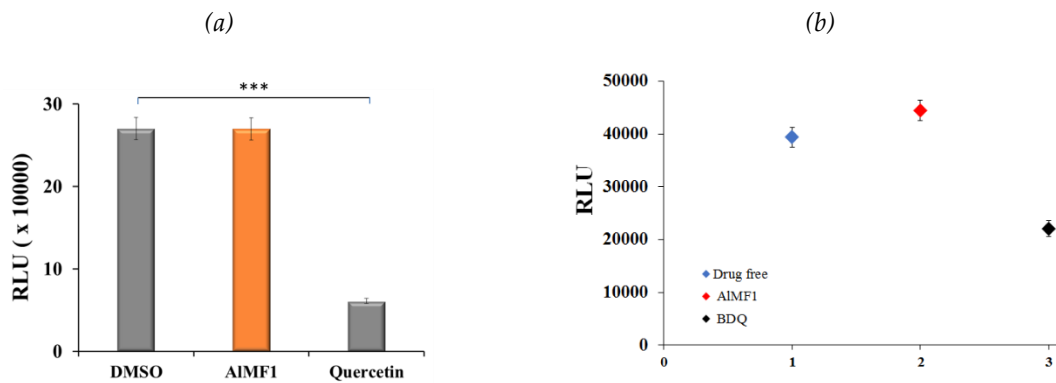

**Figure S5.** Testing the possible affect of AIMF1 on ATP synthesis of *E. coli* IMVs and intra-cellular ATP level inside mycobacteria. a ATP synthesis of *E. coli* IMVs in the presence of the vehicle control dimethyl sulfoxide (DMSO), 100  $\mu$ M of the new compound AIMF1, and 100  $\mu$ M of Quercetin as a control. The data reveal the specificity of AIMF1 as a mycobacterial F-ATP synthase inhibitor. \*\*\*:  $P < 0.0001$ , statistical analysis was carried out using one way ANOVA (analysis of variance). b Intracellular ATP level measurement of *M. smegmatis* in the presence of 1 mM AIMF1. No inhibitory effect of AIMF1 was observed. BDQ (4 nM) as a control showed inhibitory potency. In drug free conditions, DMSO was used as vehicle control. The experiment has been carried out three-times in triplicates.

**Table S1.** Table shows the ADMET properties of ligands used in this study.

| Sl.No | IDNUMBER  | logP | logSw  | XP g scores(kcal/mol) | #rotor | #rtvFG | CNS | MW      | Caco    | logBB  | MDCK    | #metab | logKhsa | %HumanOralAbsor | PSA  | RuleOfFive |
|-------|-----------|------|--------|-----------------------|--------|--------|-----|---------|---------|--------|---------|--------|---------|-----------------|------|------------|
| A1    | F293-0909 | 3.4  | -4.09  | -5.5                  | 9      | 0      | -2  | 471.573 | 51.469  | -2.017 | 25.477  | 5      | 0.231   | 81.546          | 121  | 0          |
| A2    | E918-0398 | 5.32 | -5.7   | -5.59                 | 9      | 0      | -2  | 565.671 | 1076.11 | -1.148 | 535.532 | 7      | 1.465   | 94.301          | 101  | 2          |
| A3    | E682-0164 | 4.1  | -5.86  | -5                    | 7      | 0      | -2  | 442.55  | 426.706 | -1.317 | 337.766 | 6      | 0.307   | 94.898          | 149  | 0          |
| A4    | C517-1579 | 3.38 | -3.71  | -5.5                  | 10     | 0      | -2  | 484.612 | 701.183 | -1.211 | 490.087 | 5      | 0.224   | 100             | 87.8 | 0          |
| A5    | C387-0761 | 6.22 | -2.91  | -8.26                 | 12     | 0      | -2  | 499.608 | 1794.71 | -1.147 | 930.868 | 4      | 1.228   | 100             | 84.3 | 1          |
| A6    | A0070870  | 5.38 | -6.62  | -5.54                 | 8      | 0      | -2  | 656.748 | 594.68  | -1.327 | 1160.05 | 7      | 1.411   | 92.845          | 122  | 2          |
| A7    | E532-2866 | 0.99 | -3.261 | -5.23                 | 8      | 0      | -1  | 467.966 | 501.645 | -0.883 | 1447.26 | 4      | -0.29   | 90.944          | 111  | 0          |
| A8    | C387-0037 | 3.94 | 0.6886 | -6.7                  | 10     | 0      | -1  | 423.511 | 2560.54 | -0.731 | 1366.81 | 3      | 0.43    | 100             | 76   | 0          |
| A9    | C241-2052 | 2.69 | -3.695 | -6.53                 | 10     | 0      | -2  | 442.532 | 37.333  | -2.156 | 84.73   | 6      | -0.49   | 65.424          | 142  | 0          |
| A10   | C066-2093 | 1.22 | 0.0497 | -5.3                  | 9      | 0      | -1  | 407.468 | 593.997 | -0.968 | 659.237 | 4      | -0.447  | 92.178          | 99.6 | 0          |
| A11   | 6623-2029 | 3.21 | -1.952 | -7.23                 | 13     | 1      | -2  | 463.573 | 298.028 | -1.874 | 286.512 | 4      | 0.322   | 100             | 135  | 0          |

*LogP* : Partition Coefficient

*logSw*: Water solubility

*#rotor*: rotatable bonds

*#rtvFG*: reactive functional groups

*CNS*: Central Nervous System

*Mol\_MW*: Molecular Weight

*logHERG*: human ether-a-go-go-related gene

*CaCo*: Caco-2 Permeability

*logBB*: Blood Brain barrier

*MDCK*: Madin-Darby Canine Kidney-P-glycoprotein assay for Permeability/ Drug Efflux

*#metab*: No. of Metabolism routes

*HSB*: human serum binding

*% human oral absorption*

*PSA*: Polar Surface Area
